# Supplementary material for: The crystal structure of yeast mitochondrial ThrRS in complex with the canonical threonine tRNA
Source: PubMed Central journal article supplement — Nucleic Acids Res. 2015 Dec 23;44(3):1428–39. doi: 10.1093/nar/gkv1501 (PMC4756836; doi:10.1093/nar/gkv1501), 2015-12-23
Supplement: supp_gkv1501_nar-02752-r-2015-File008.pdf [file supp_gkv1501_nar-02752-r-2015-File008.pdf]

## Supplementary Material

### **The Crystal Structure of Yeast Mitochondrial ThrRS in Complex With the Canonical Threonine tRNA**

Kaitlyn M Holman<sup>1</sup>, Jiang Wu<sup>2</sup>, Jiqiang Ling<sup>2</sup>, Miljan Simonović<sup>1,\*</sup>

<sup>1</sup> Department of Biochemistry and Molecular Genetics, University of Illinois at Chicago, Chicago, IL, 60607, U.S.A.

<sup>2</sup> Department of Microbiology and Molecular Genetics, The University of Texas, Health Science Center at Houston, Houston, TX 77030, U.S.A.

\* To whom correspondence should be addressed: Tel: + 1 (312) 996-0059; Fax: + 1 (312) 413-0353; Email: msimon5@uic.edu

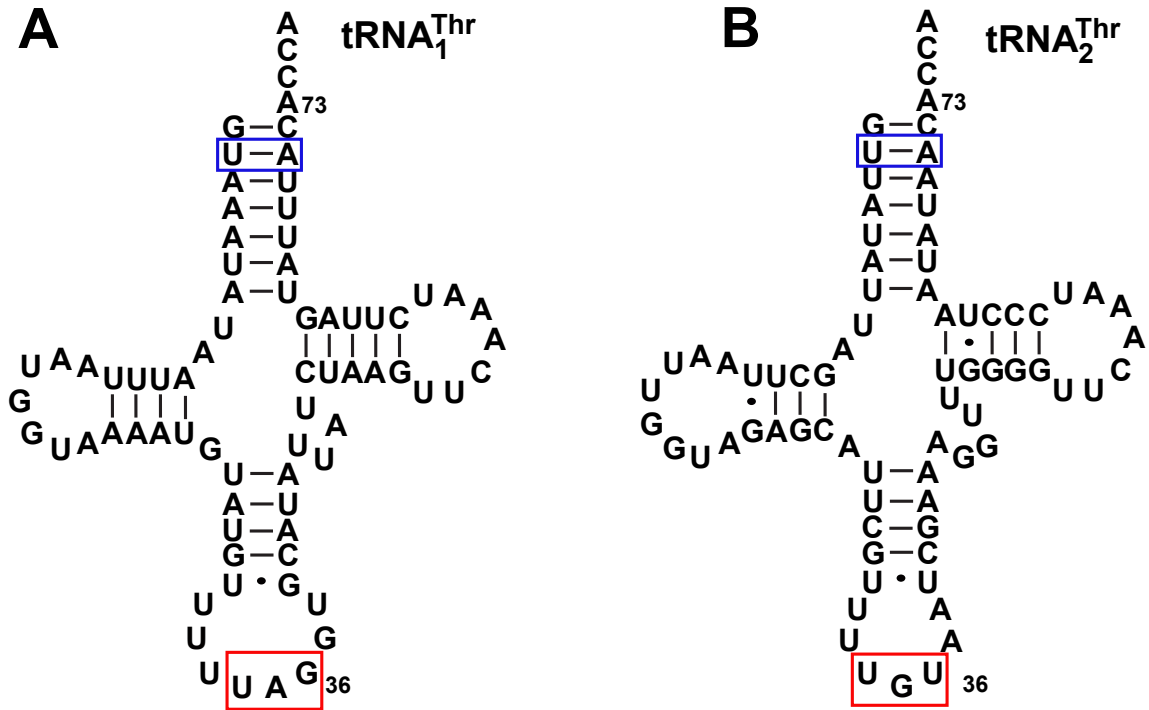

**Supplementary Figure 1. Nucleotide sequences of *S. cerevisiae* mitochondrial tRNAs. (A)**  $tRNA_1^{Thr}$  contains an enlarged 8-nucleotide anticodon loop with the UAG anticodon sequence (red box). **(B)**  $tRNA_2^{Thr}$  contains the canonical 7-nucleotide anticodon loop and the canonical UGU anticodon (red box). The second base pair in the acceptor stem is highlighted with blue box. The structure of the MST1-  $tRNA_2^{Thr}$  complex suggests that MST1 recognizes the sequence of this conserved base pair.

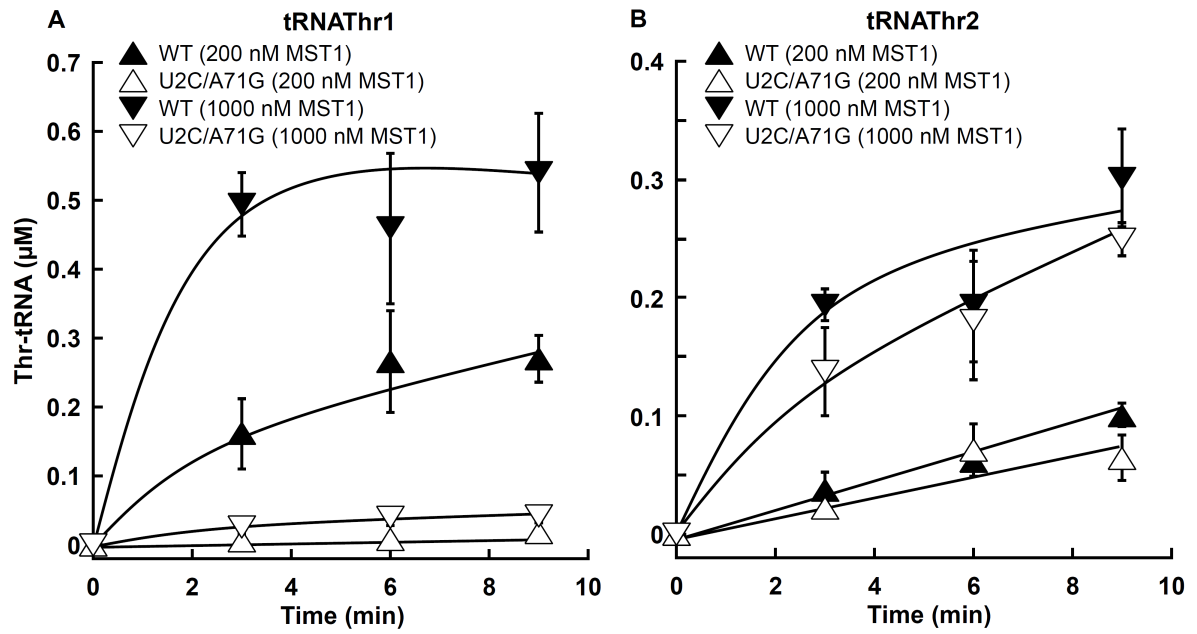

**Supplementary Figure 2. Aminoacylation of *S. cerevisiae* mitochondrial tRNA variants by MST1.** The experiment was repeated three times with error boars indicating standard deviations.

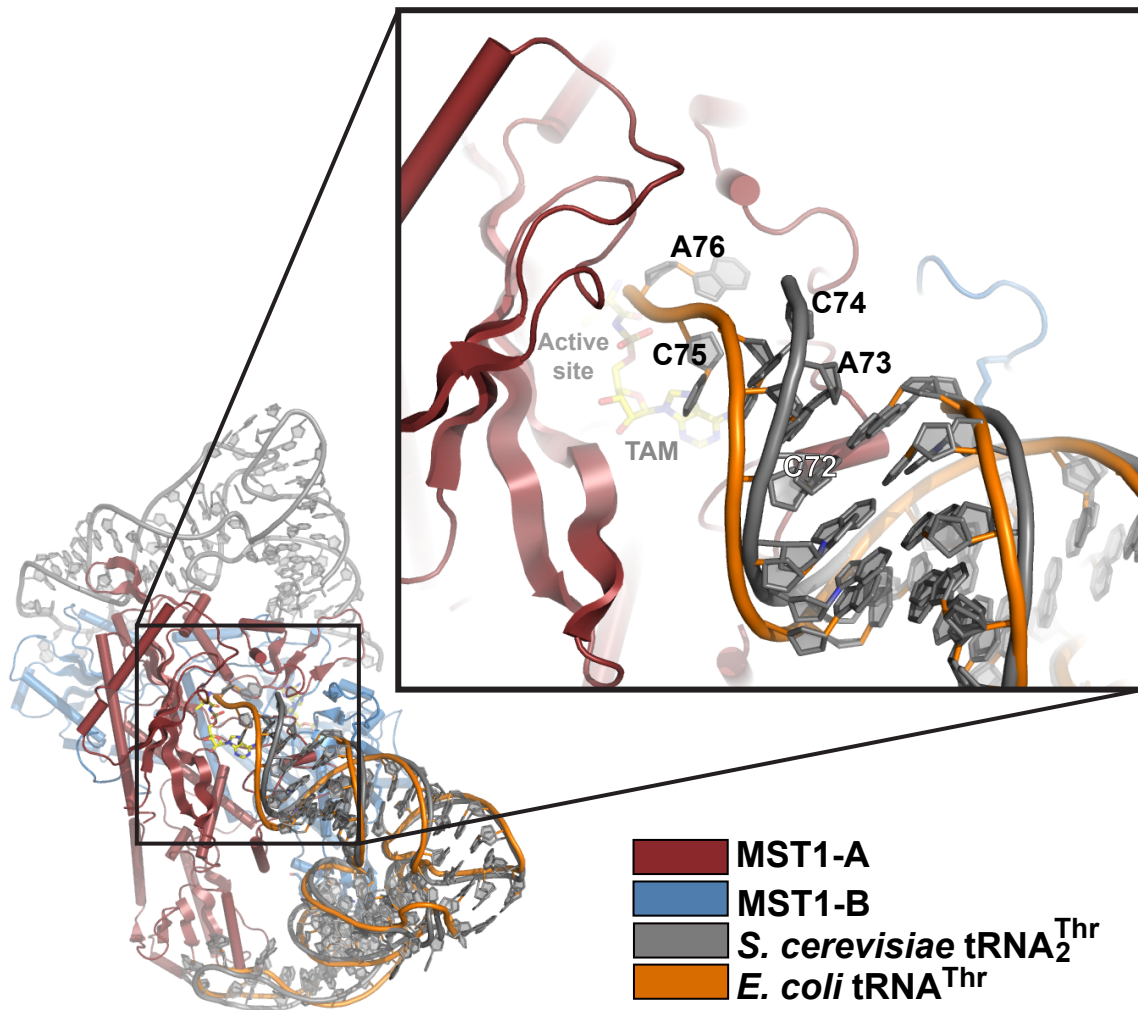

**Supplementary Figure 3. The 3' end of tRNA<sub>2</sub><sup>Thr</sup> remains flexible after binding to MST1.** Superimpositioning of the acceptor stem of *E. coli* tRNA<sup>Thr</sup> onto tRNA<sub>2</sub><sup>Thr</sup> bound to MST1 shows the flexibility of the 3' end of tRNA<sub>2</sub><sup>Thr</sup>. C75 and A76 were not visible in our crystal structure.

**Supplementary Table 1. Aminoacylation kinetics of tRNA<sub>2</sub><sup>Thr</sup> variants**

| Scmt tRNA <sub>2</sub> <sup>Thr</sup> | $k_{\text{cat}}$ (min <sup>-1</sup> ) | $K_m$ ( $\mu\text{M}$ ) | $k_{\text{cat}}/K_m$ (min <sup>-1</sup> $\mu\text{M}^{-1}$ ) | Fold change |
|---------------------------------------|---------------------------------------|-------------------------|--------------------------------------------------------------|-------------|
| WT                                    | 0.28 $\pm$ 0.03                       | 0.23 $\pm$ 0.08         | 1.29 $\pm$ 0.32                                              | 1           |
| U2C/A71G                              | 0.10 $\pm$ 0.008                      | 0.26 $\pm$ 0.19         | 0.56 $\pm$ 0.31                                              | 2.3         |
